# Supplementary material for: High-coverage plasma lipidomics reveals novel sex-specific lipidomic fingerprints of age and BMI: Evidence from two large population cohort studies
Source: PLoS Biol. 2020 Sep 28;18(9):e3000870. doi: 10.1371/journal.pbio.3000870 (PMC7544135; doi:10.1371/journal.pbio.3000870)
Supplement: S14 Table — BMI, body mass index; PE(O), alkylphosphatidylethanolamine; PE(P), alkenylphosphatidylethanolamine. (XLSX) [file pbio.3000870.s033.xlsx]

## Sheet: Table S14
S14 Table : Association of the PE(P) to PE(O) ratios with BMI, age or sex
Phenotype	Lipid 1 (PE(P))	Lipid 2 (PE(O))	Class 1	Class 2	Beta estimate (ratio)	Beta estimate (Lipid 1)	Beta estimate (Lipid 2)	SE	T-value	Log10(p-value)(ratio)	Log10(p-value) (Lipid1)	Log10(p-value) (Lipid2)	p-Gain	Log10(p-Gain)	Log10( BH_p-value) (ratio)	Correlation coefficient (r)
BMI	PE(P-16:0/18:2)	PE(O-16:0/18:2)	PE(P)	PE(O)	0.0291	0.0006	-0.0226	0.0021	13.92	-42.94	-0.13	-28.13	660693448007596	14.82	-42.23	0.59
	PE(P-16:0/20:4)	PE(O-16:0/20:4)	PE(P)	PE(O)	0.0303	0.021	-0.0054	0.0021	14.62	-47.21	-24.28	-2.1	8.51138e+22	22.93	-46.45	0.63
	PE(P-16:0/22:6)	PE(O-16:0/22:6)	PE(P)	PE(O)	0.0281	0.0076	-0.0092	0.0021	13.27	-39.11	-4.18	-5.7	2.5704e+33	33.41	-38.45	0.8
	PE(P-18:0/20:4)	PE(O-18:0/20:4)	PE(P)	PE(O)	0.0226	0.0093	-0.0107	0.0021	10.74	-26.05	-5.34	-6.79	1.8197e+19	19.26	-25.55	0.56
Age	PE(P-16:0/22:6)	PE(O-16:0/22:6)	PE(P)	PE(O)	0.0102	0.0012	-0.0047	0.0007	14.67	-47.54	-1.27	-13.04	3.0903e+34	34.49	-46.87	0.8
	PE(P-18:0/22:6)	PE(O-18:0/22:6)	PE(P)	PE(O)	0.0103	0.0048	-0.0025	0.0007	14.74	-47.97	-12.96	-4.08	1.02329e+35	35.01	-47.3	0.73
Sex	PE(P-16:0/18:2)	PE(O-16:0/18:2)	PE(P)	PE(O)	0.3646	0.1837	-0.1393	0.0208	17.54	-67.16	-19.34	-11.29	6.45654e+47	47.81	-66.48	0.59
	PE(P-16:0/20:4)	PE(O-16:0/20:4)	PE(P)	PE(O)	0.3474	0.2391	-0.0634	0.0206	16.86	-62.21	-31.46	-2.76	5.62341e+30	30.75	-61.57	0.63
	PE(P-18:0/20:4)	PE(O-18:0/20:4)	PE(P)	PE(O)	0.4362	0.2757	-0.1229	0.0209	20.86	-93.99	-41.23	-8.79	5.7544e+52	52.76	-93.11	0.56
	PE(P-18:0/22:6)	PE(O-18:0/22:6)	PE(P)	PE(O)	0.241	0.0105	-0.1644	0.0212	11.37	-29.04	-0.23	-16.88	1.44544e+12	12.16	-28.67	0.73
